# Supplementary material
Source: PubMed Central journal article supplement (PMC8848197)
Supplement: jama-e220423-s003.pdf [file jama-e220423-s003.pdf]

Simon GE, Shortreed SM, Rossom RC, et al. Effect of offering care management or online dialectical behavior therapy skills training vs usual care on self-harm among adult outpatients with suicidal ideation: a randomized clinical trial. *JAMA*. Published February 15, 2022. doi:10.1001/jama.2022.0423

## Data Sharing Statement

### Data

**Data available:** Yes

**Data types:** Deidentified participant data

**How to access data:** De-identified data will be made available via the NIMH Data Archive at time of publication

**When available:** With publication

### Supporting Documents

**Document types:** Other (please specify)

**Additional Information:** Intervention manuals

**How to access documents:** [https://github.com/MHResearchNetwork/SPOT\\_Study](https://github.com/MHResearchNetwork/SPOT_Study)

**When available:** With publication

### Additional Information

**Who can access the data:** We anticipate sharing data via the NIMH Data Archive, but we are awaiting modifications to the Data Archive's policies regarding participant consent. This should be decided by end of November.

**Types of analyses:** Data access will follow the rules of the NIMH Data Archive

**Mechanisms of data availability:** Data access will follow the rules of the NIMH Data Archive

**Any additional restrictions:** Data access will follow the rules of the NIMH Data Archive
